# Supplementary material
Source: PubMed Central journal article supplement (PMC7324172)
Supplement: jci-130-134424-s215.pdf [file jci-130-134424-s215.pdf]

# Supplemental Figure 1

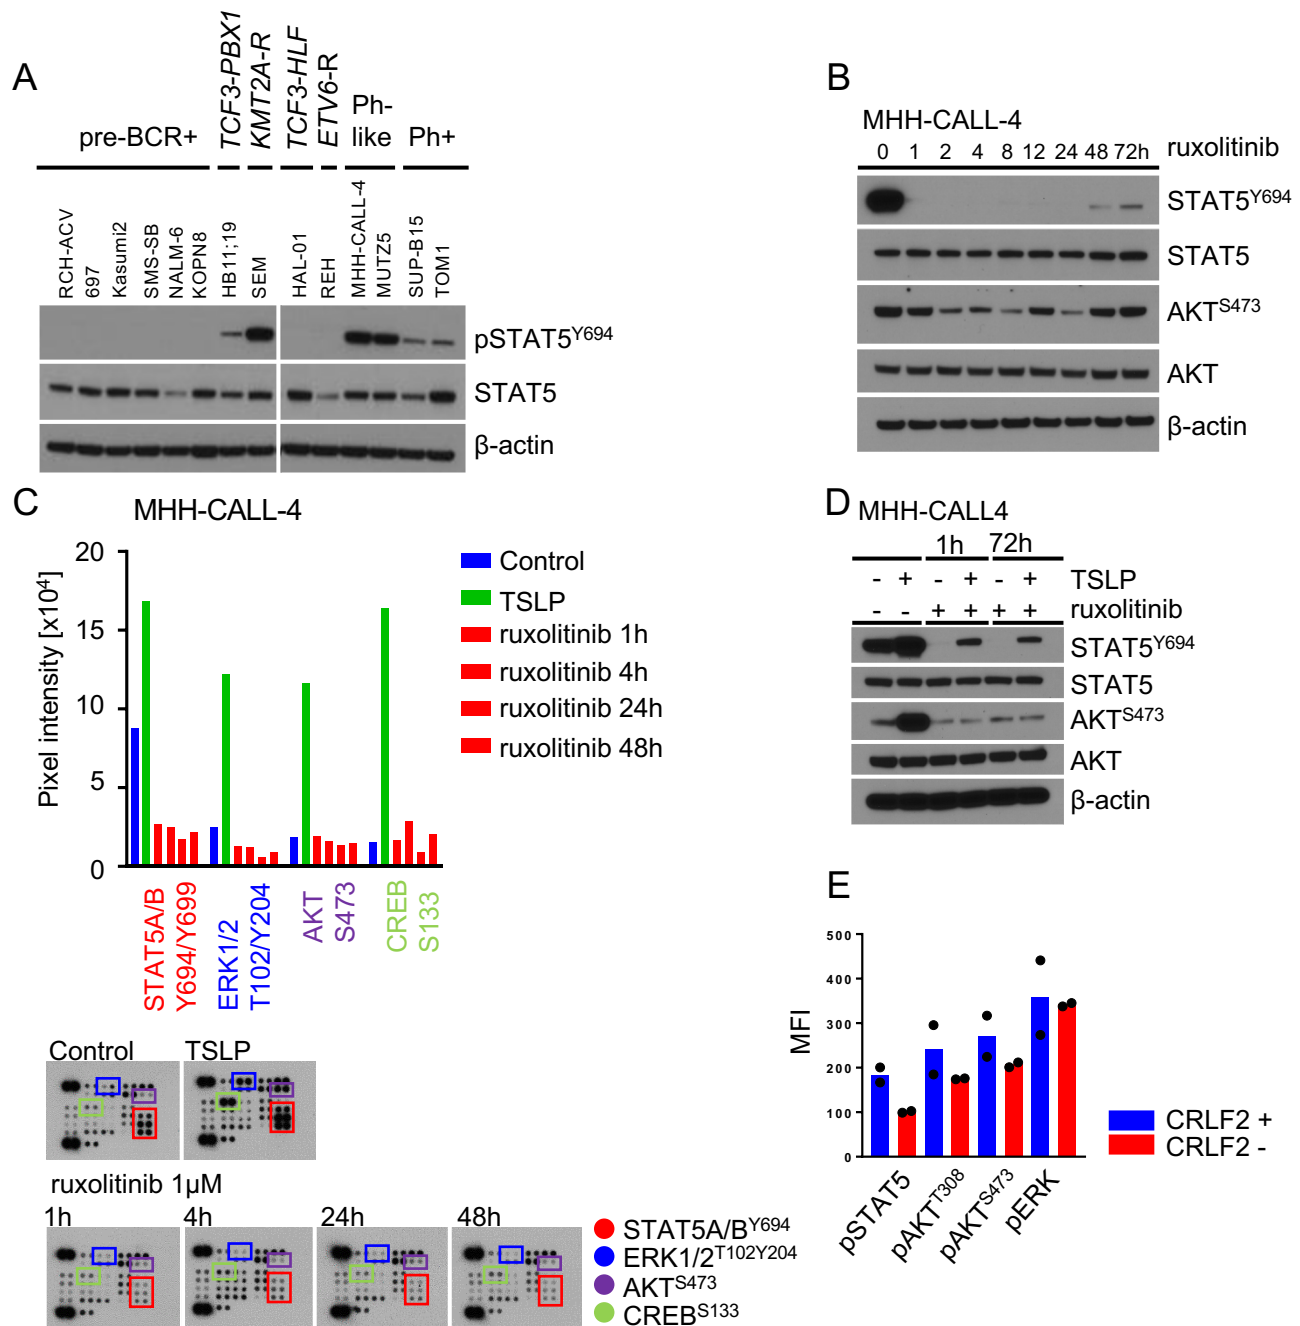

**(A)** Western blot analysis of pSTAT5 in multiple B-ALL cell lines using beta-actin as loading control. **(B)** Protein analysis of indicated targets in MHH-CALL-4 cells treated with 1  $\mu$ M ruxolitinib for the indicated timepoints. **(C)** Phosphoprotein analysis using the human phospho-kinase array from R&D Systems in MHH-CALL-4 cells treated with TSLP (25 nM x 30 min) or ruxolitinib (1  $\mu$ M x 1h). A scan of each blot for each condition is included on the bottom. The colored boxes indicate changes that were observed with TSLP stimulation (n=1). **(D)** MHH-CALL-4 cells were treated either with TSLP (25 nM x 30min) or ruxolitinib (1 $\mu$ M x 1h or 72h) alone or TSLP was added to the ruxolitinib treated samples (25nM; 30 min). Protein expression of pSTAT5<sup>Y694</sup>, pAKT<sup>S473</sup>, and the corresponding total protein controls were tested via Western blot using beta-actin as control. **(E)** MUTZ5 cells isolated from the spleen of terminally sick NSG mice (shown in Figure 2E) were tested for signaling activation via phosphoflow in CRLF2-null and CRLF2-expressing cells by gating on the corresponding cells (see Figure 2E). Only two of the three injected mice were available for this analysis.

# Supplemental Figure 2

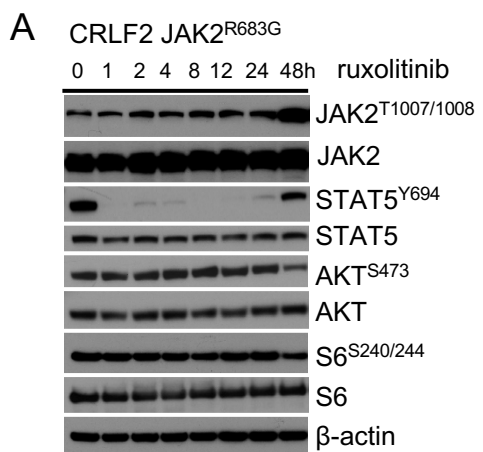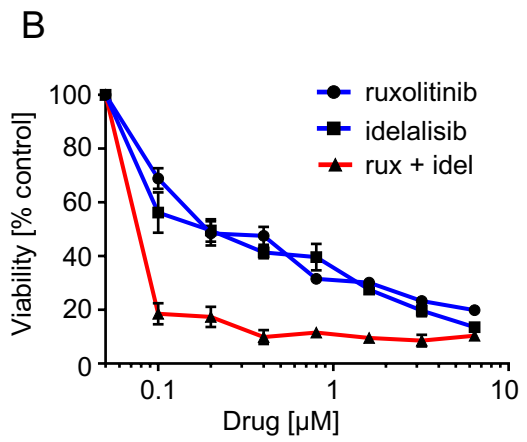

**(A)** Protein analysis of indicated targets in murine CRLF2/JAK2<sup>R683G</sup> Ph-like ALL cells treated with 500 nM ruxolitinib for the indicated time points. β-actin was used as loading control. **(B)** Viability of mCRLF2-JAK2 cells treated with increasing concentrations of ruxolitinib and idelalisib (blue) or with 1 μM idelalisib and increasing concentrations of ruxolitinib (red) was assessed (n=3). Data are represented as individual values with mean ± SEM bars.

# Supplemental Figure 3

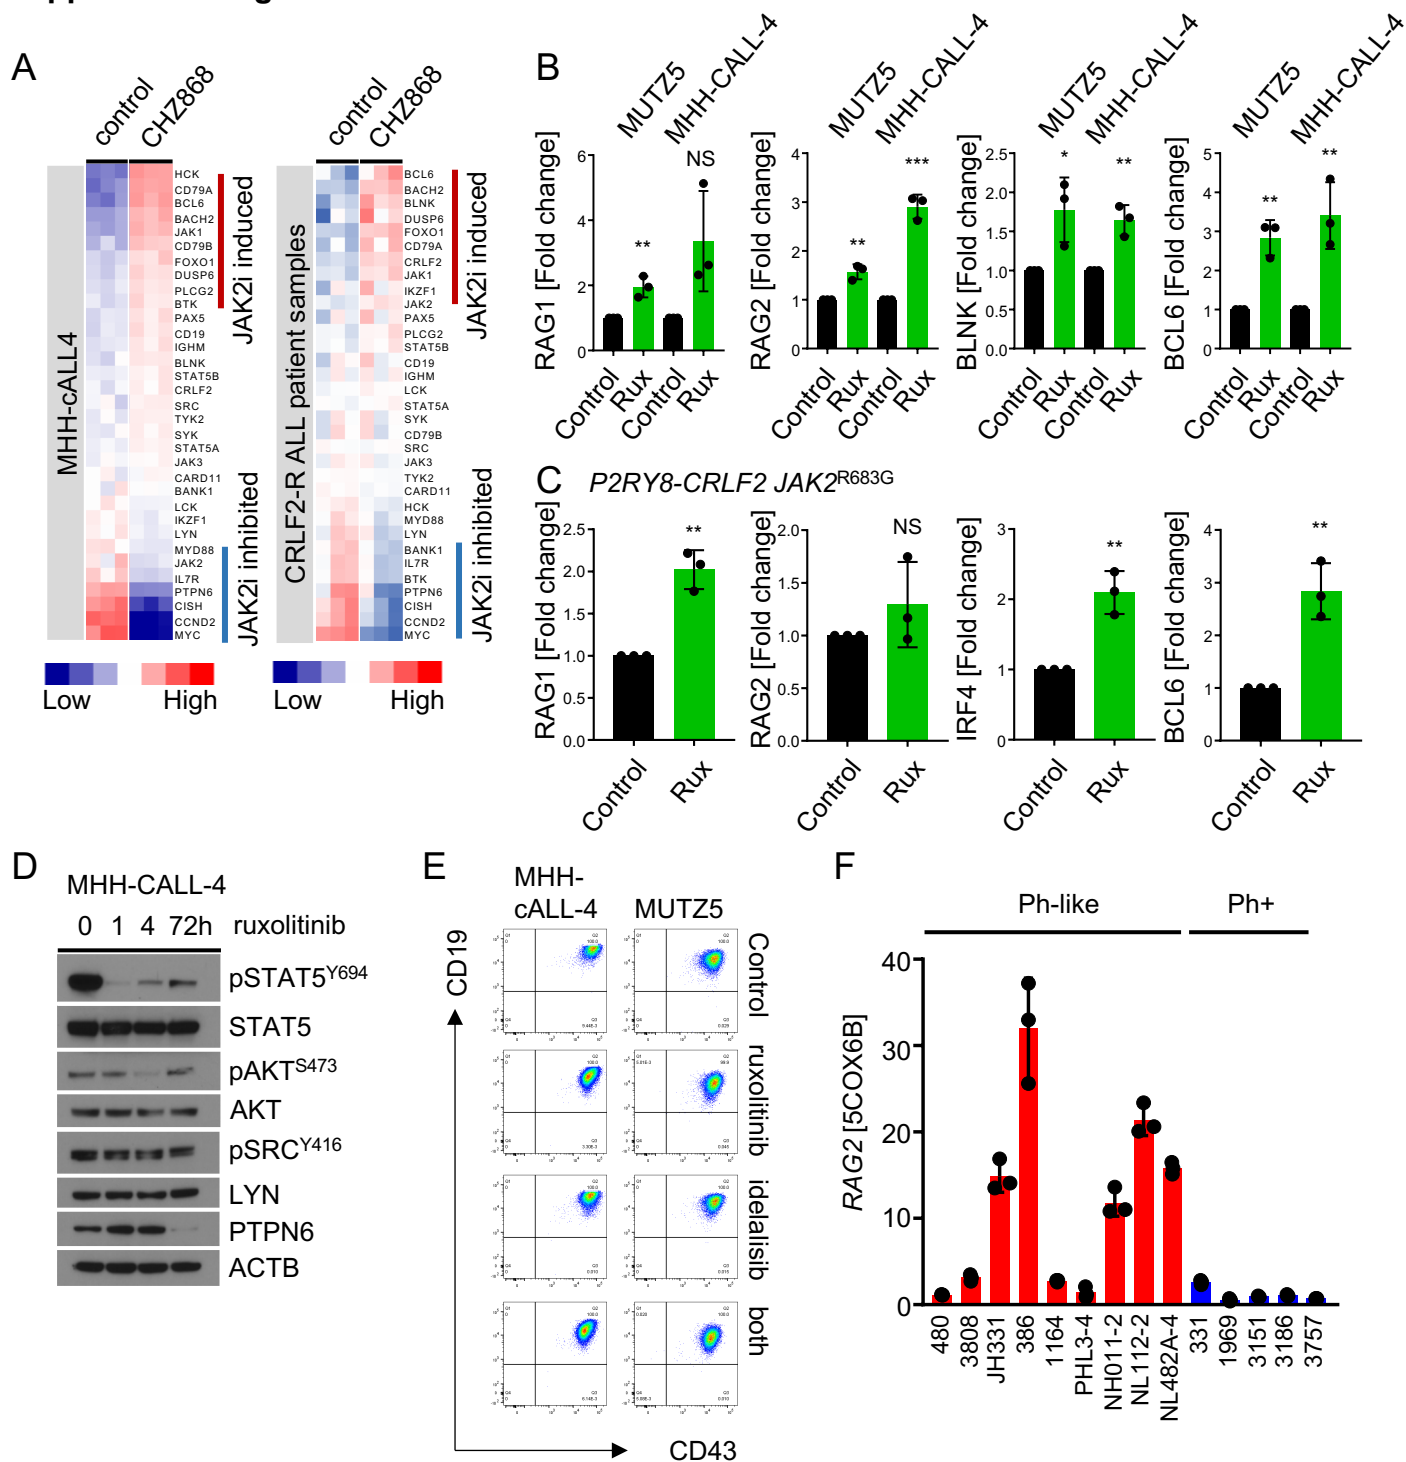

**(A)** Supervised meta-analysis of gene expression data (GSE61696). RT-PCR validation of gene expression data for the indicated targets in **(B)** MUTZ5 and MHH-CALL-4 and **(C)** Ph-like ALL4364 PDX model treated in vitro with 1  $\mu$ M ruxolitinib for 12h (n=3 independent experiments/biologic replicates each with 3 technical replicates). **(D)** MHH-CALL4 cells were treated with 1  $\mu$ M ruxolitinib for indicated timepoints. Protein levels for the indicated targets were determined via Western blotting. **(E)** Flow cytometric analysis of CD19 and CD43 expression in MHH-CALL-4 cells treated with ruxolitinib (1  $\mu$ M), idelalisib (1  $\mu$ M) or both (n=3). **(F)** *RAG2* expression levels were tested in the indicated PDX samples (Ph-like red; Ph+ blue) via RT-PCR using *COX6B* as control (n=3). Data are represented as individual values with mean  $\pm$  SEM bars.

**Supplemental Figure 4**

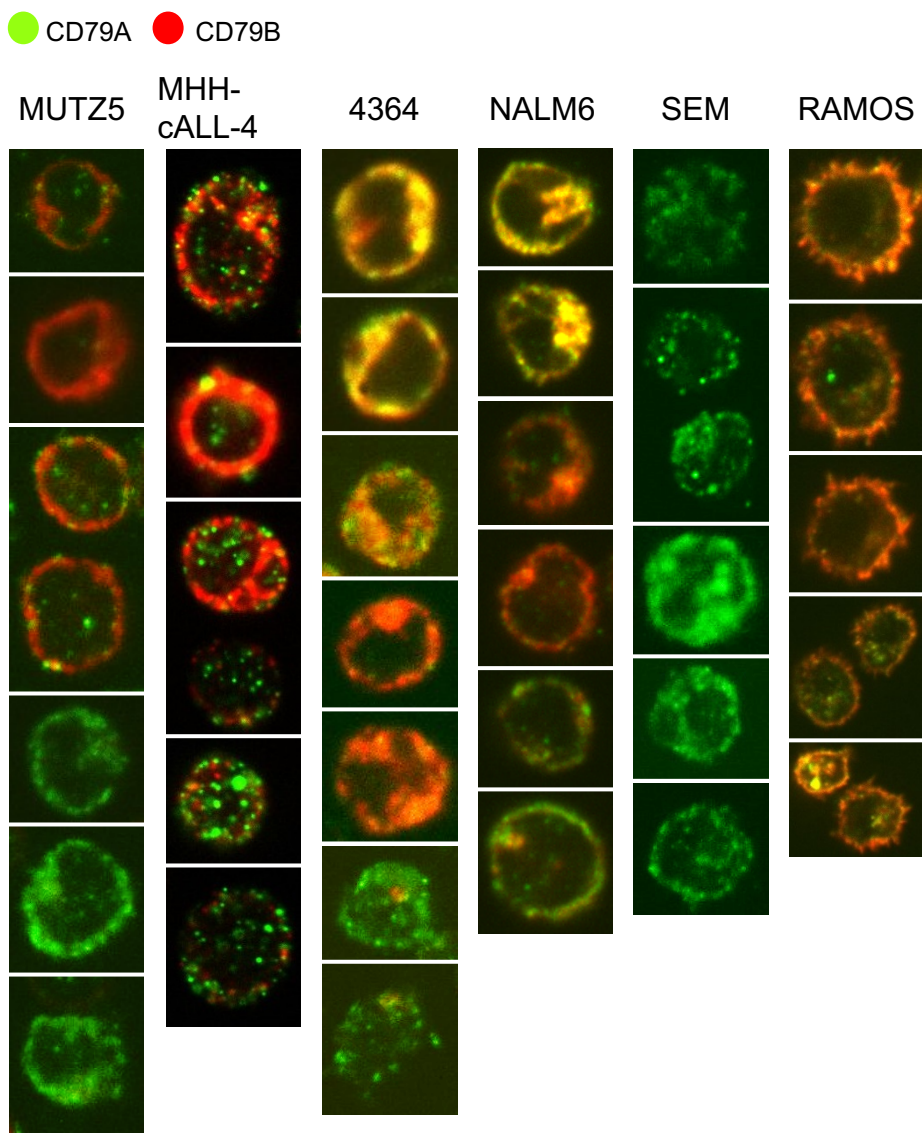

Immunofluorescence microscopy for CD79A (green) and CD79B (red) in Ph-like ALL cell lines (MUTZ5, MHH-CALL-4) and one Ph-like ALL PDX sample (ALL4364). The CD79B-negative *KMT2A-R* B-ALL cell line SEM was used as negative control, and the CD79A+/CD79B+ lymphoma cell line Ramos was used as positive control.

## Supplemental Figure 5

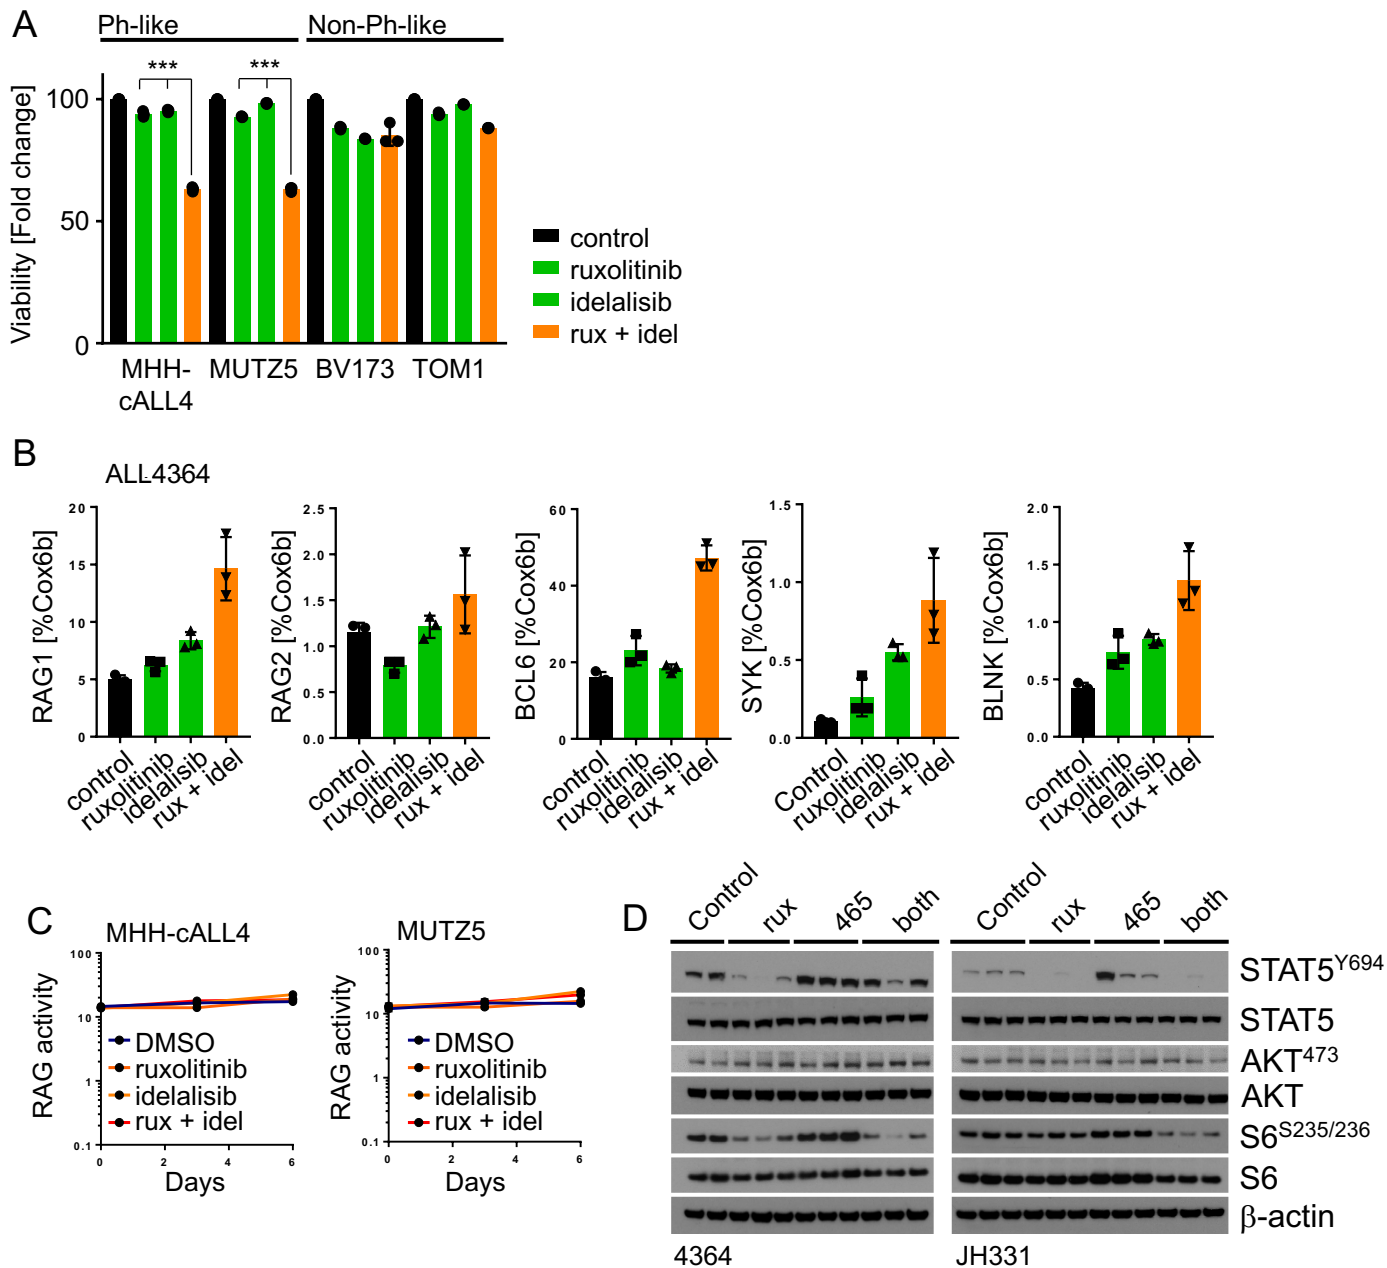

**(A)** Viability analysis via flow cytometry in 2 Ph-like and 2 Ph+ ALL cell lines after 3 days of treatment with ruxolitinib, idelalisib, or a combination of both (each 1  $\mu$ M, n=3 independent experiments). **(B)** Cells from the Ph-like *CRLF2-R* PDX ALL4364 model were treated for 4h with 1 $\mu$ M ruxolitinib and 2 $\mu$ M idelalisib or both drugs. RT-PCR was performed, and expression levels of the indicated targets was tested in comparison to *COX6B* as control (n=3 technical repeats). **(C)** MUTZ5 and MHH-CALL-4 cells were lentivirally transduced with a RAG enzyme activity reporter. Both cell lines were treated with ruxolitinib and idelalisib for 6 days with a concentration of 1  $\mu$ M for each drug. **(D)** Protein analysis of pSTAT5 and pS6 of isolated ALL PDX cells from the in vivo experiment described in Figure 4 D and E. Three mice were used for each treatment group. Data for (A) are represented as individual values with mean  $\pm$  SEM bars, \*p<0.05, \*\*p<0.01, \*\*\*p<0.001, \*\*\*\*p<0.0001 by unpaired t-test.

## Supplemental Figure 6

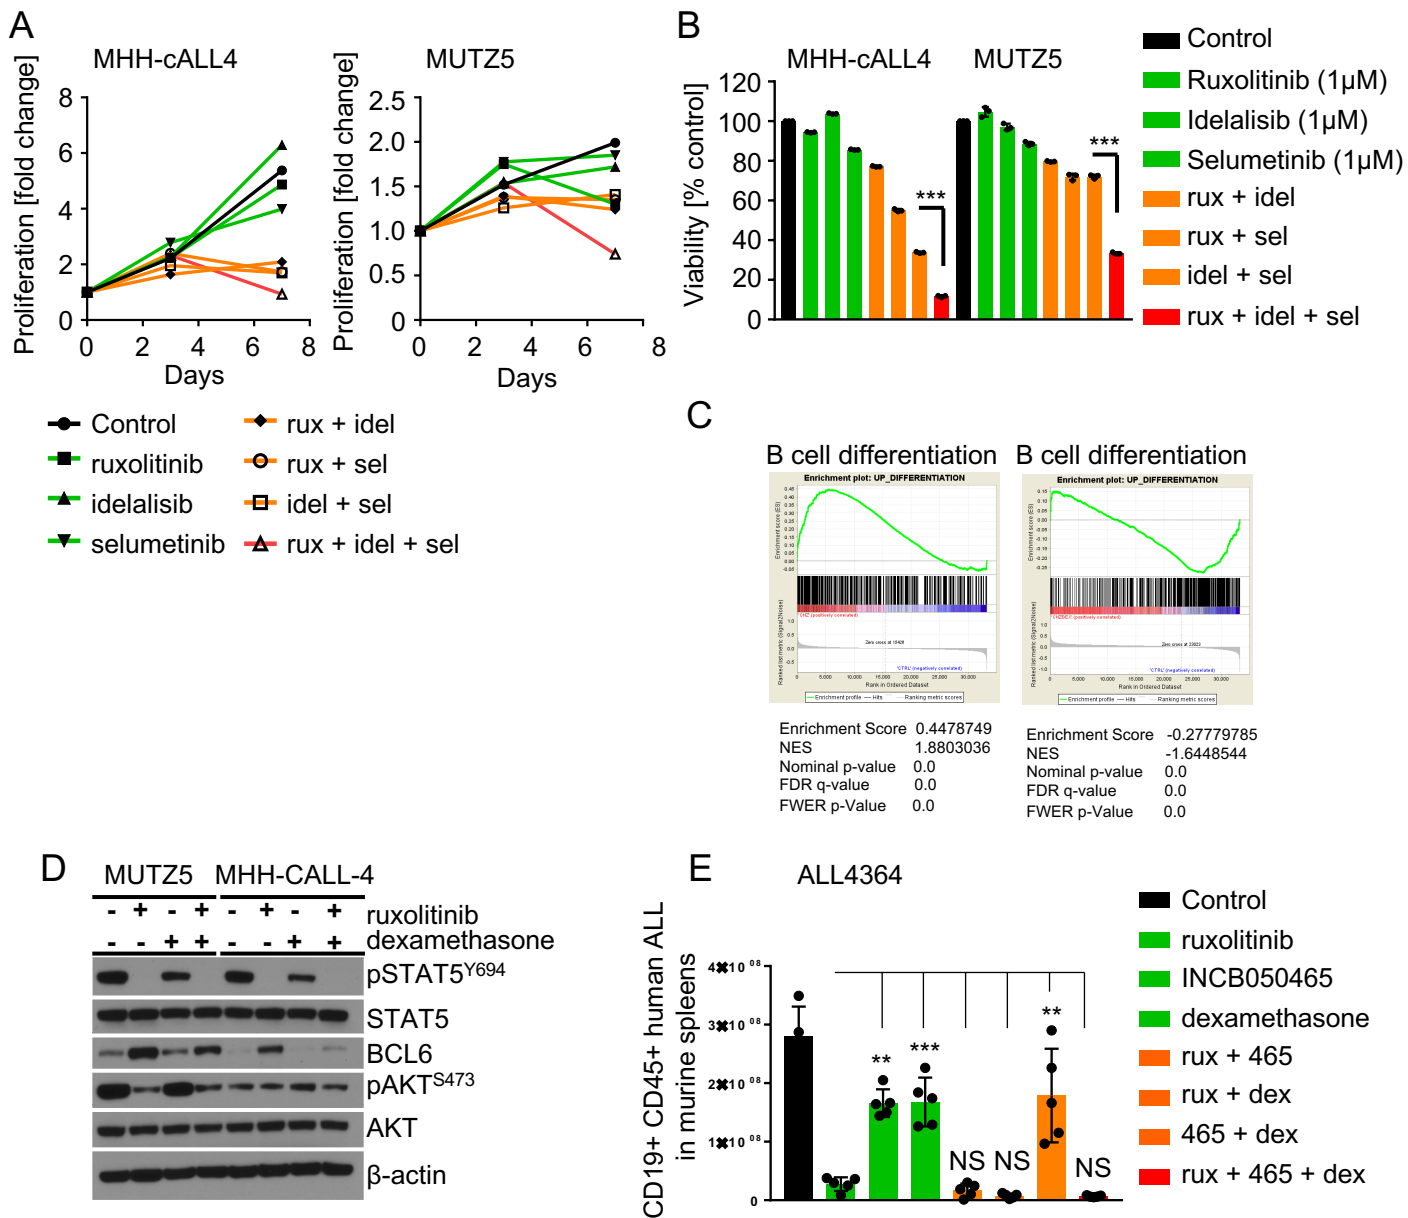

(A) MHH-CALL-4 and MUTZ5 cells were treated with the indicated kinase inhibitors, and cell proliferation was monitored over time using an automated cell counter (7 days, n=3). (B) 7AAD/ANNEXIN V flow cytometry analysis of MHH-CALL-4 and MUTZ5 cells treated with indicated kinase inhibitors (1 µM each; 3 days, n=3). (C) Gene set enrichment analysis (GSEA) plots demonstrate i) enrichment of B cell differentiation gene sets in CRLF2-rearranged B-ALL PDXs cells treated with CHZ868 compared to vehicle-treated controls (left panel) or ii) cotreatment with dexamethasone (right panel) for treatment details see<sup>44</sup>. Statistics are shown. (D) MHH-CALL-4 and MUTZ5 cells were treated with ruxolitinib (1µM) or dexamethasone (10 nM) for 4h and subjected to a protein analysis of the indicated target genes. (E) Mice were injected via tail vein with Ph-like ALL PDX ALL4364 cells. Once 5% blast were detected in the blood, therapy of the indicated drug combination was initiated (see Material and Methods for dosing). Mice were treated for 4 weeks and sacrificed 12h after the treatment has stopped and spleen and blood cells were analysis via flow cytometry for CD19+/CD45+ ALL cells. Data are represented as individual values with mean ± SEM bars, \*p<0.05, \*\*p<0.01, \*\*\*p<0.001, \*\*\*\*p<0.0001 by unpaired t-test (B) or ANOVA with Dunnett post-test for multiple comparisons (E).

**Supplemental Table 1**

| Patient                     | USI     | Age (years) | WBC Count (10e3 cells/uL) | Sex | Race/Ethnicity  | Genomic Lesion(s)                                  | Cytogenetics                                                                                                                    | Notes                                                                                                             | Induction Chemotherapy Regimen or Trial | TKI | HSCT    |
|-----------------------------|---------|-------------|---------------------------|-----|-----------------|----------------------------------------------------|---------------------------------------------------------------------------------------------------------------------------------|-------------------------------------------------------------------------------------------------------------------|-----------------------------------------|-----|---------|
| <b>Ph-like B-ALL (n=14)</b> |         |             |                           |     |                 |                                                    |                                                                                                                                 |                                                                                                                   |                                         |     |         |
| 1                           | UP_386  | 64          | 28.6                      | F   | Caucasian       | <i>P2RY8-CRLF2, JAK2 R683G</i>                     | 46,XX                                                                                                                           |                                                                                                                   | hyperCVAD                               | no  | unknown |
| 2                           | UP_480  | 49          | 2.9                       | M   | Caucasian       | <i>IGH-CRLF2</i>                                   | 46,XY                                                                                                                           |                                                                                                                   | E2993                                   | no  | yes     |
| 3                           | UP_810  | 62          | 9.7                       | M   | Caucasian       | * <i>CRLF2+</i>                                    | 46,XY                                                                                                                           |                                                                                                                   | hyperCVAD                               | no  | no      |
| 4                           | UP_1164 | 42          | 19.3                      | M   | Caucasian       | <i>P2RY8-CRLF2, JAK2 K682delinsGG E</i>            | n/a                                                                                                                             |                                                                                                                   | hyperCVAD                               | no  | yes     |
| 5                           | UP_2142 | 29          | 136.2                     | M   | Caucasian       | <i>IGH-CRLF2</i>                                   | 46,XY,del(9)(p21p21)[6]/46,X,Y[24]                                                                                              | Positive FISH for deletion of 9p21 ( <i>CDKN2A</i> and <i>CDKN2B</i> ); nuc ish(9p11-q11.1x2),(CDKN2Ax1)[130/200] | C10403                                  | no  | yes     |
| 6                           | UP_2549 | 28          | 2.2                       | M   | Caucasian       | <i>IGH-CRLF2, JAK2 R938Q</i>                       | 46,XY                                                                                                                           |                                                                                                                   | C10403                                  | no  | no      |
| 7                           | UP_3211 | 63          | 14.5                      | M   | Caucasian       | <i>IGH-CRLF2, JAK2 F694L</i>                       | n/a                                                                                                                             |                                                                                                                   | hyperCVAD                               | no  | no      |
| 8                           | UP_3808 | 43          | 42.1                      | M   | Caucasian       | <i>IGH-CRLF2, JAK2 R683G</i>                       | 46,XY                                                                                                                           |                                                                                                                   | hyperCVAD                               | no  | unknown |
| 9                           | UP_4986 | 37          | 193.5                     | M   | Hispanic/Latino | <i>IGH-CRLF2, JAK2 L977L and C616_C618delinsGV</i> | 46,XY                                                                                                                           |                                                                                                                   | E1910/arm A                             | no  | no      |
| 10                          | UP_4988 | 60          | 60.5                      | F   | Hispanic/Latino | <i>IGH-CRLF2, JAK2 F694S</i>                       | 46,XX,del(7)(p11.2)[7]/46,XX[13]                                                                                                | <i>KRAS G12R &amp; NOTCH1 VUS</i>                                                                                 | E1910/arm A                             | no  | yes     |
| 11                          | UP_5049 | 41          | 46                        | F   | Caucasian       | Ph-like kinase fusions not detected                | 45,XX,add(3)(q?24),-7[6]/46,XX[4]                                                                                               | <i>FLT3</i> internal tandem duplication                                                                           | yes                                     | no  | yes     |
| 12                          | UP_5318 | 29          | 23.2                      | M   | Caucasian       | truncated <i>EPOR, TBL1XR1-PIK3CA</i>              | 46,XY,t(2;19)(p21;p13.1)[2]/46,XY[18]                                                                                           | Negative for <i>ABL1</i> and <i>JAK2</i> fusion genes on panel.                                                   | C10403                                  | no  | no      |
| 13                          | UP_6005 | 75          | 24.2                      | M   | Hispanic/Latino | <i>IGH-CRLF2, KRAS G12D</i>                        | 48,XY,+8,+21[12]/46,XY[2]                                                                                                       | <i>BCORL1 P562Rfs*43 and FLT3 N676K</i> pathogenic mutations on CPD                                               | ECOG 1910                               | no  | no      |
| 14                          | UP_6096 | 76          | 48.2                      | F   | Caucasian       | <i>TP53 R280S</i>                                  | 35-38,XX,-3,-7,-9,dic(10;18)(q26;p11.2),der(12)t(9;12)(q13;p13),-13,-15,-16,-17,add(17)(p11.2),-19,-20,+1-2mar[c p11]/46,XX[11] | <i>BCOR D1712N (VUS) and TPMT A154T and Y240C</i>                                                                 | weekly vincristine, IT cytarabine       | no  | no      |

Supplemental Table 1

| Patient                 | USI     | Age (years) | WBC count (10e3 cells/uL) | Sex | Race/Ethnicity         | Genomic lesion(s) | Cytogenetics                                                                                                                      | Notes               | Induction Chemotherapy Regimen or Trial | TKI             | HSCT    |
|-------------------------|---------|-------------|---------------------------|-----|------------------------|-------------------|-----------------------------------------------------------------------------------------------------------------------------------|---------------------|-----------------------------------------|-----------------|---------|
| <b>Ph+ B-ALL (n=33)</b> |         |             |                           |     |                        |                   |                                                                                                                                   |                     |                                         |                 |         |
| 15                      | UP_408  | 21.9        | 31.3                      | M   | Caucasian              | BCR-ABL1 p190     | 46,XY[11]                                                                                                                         | BCR-ABL1+ by RT-PCR | E2993                                   | no              | unknown |
| 16                      | UP_1120 | n/a         | 161                       | M   | n/a                    | BCR-ABL1 p190     | n/a                                                                                                                               |                     | unknown                                 | unknown         | unknown |
| 17                      | UP_1182 | 61          | 35.1                      | F   | Caucasian              | BCR-ABL1 p190     | 46,XX,t(9;22)(q34;q11.2)[9]                                                                                                       |                     | hyperCVAD                               | yes - imatinib  | unknown |
| 18                      | UP_1441 | 37          | 35.1                      | F   | Hispanic/Latino        | BCR-ABL1 p190     | n/a                                                                                                                               |                     | hyperCVAD                               | yes - imatinib  | yes     |
| 19                      | UP_1866 | 64          | 19.4                      | M   | n/a                    | BCR-ABL1 p190     | 53-55,XY,+X,+der(1)t(1;7)(p13;q11.2),+2,+6,-7,t(9;22)(q34;q11.2),+10,+11,+14,+18,+21,+der(22)t(9;22),+mar[cp16]/46,XY[4]          |                     | hyperCVAD                               | yes - imatinib  | no      |
| 20                      | UP_1969 | 52          | 17.7                      | F   | Caucasian              | BCR-ABL1 p210     | 46,XX,t(9;22)(q34;q11.2)[10]/45,XX,-7,t(9;22)(q34;q11.2)[3]/46,XX[12]                                                             |                     | hyperCVAD                               | yes - imatinib  | no      |
| 21                      | UP_2270 | 54          | 12.6                      | M   | Caucasian              | BCR-ABL1 p210     | 46,XY,t(9;22)(q34;q11.2)[10]/46,XY[15]                                                                                            |                     | hyperCVAD                               | yes - dasatinib | no      |
| 22                      | UP_2802 | 78          | 6.8                       | F   | Caucasian              | BCR-ABL1 p190     | 46,XX,t(9;22)(q34;q11.2)[6]/46,XX[2]                                                                                              |                     | methotrexate & cytarabine               | yes - dasatinib | no      |
| 23                      | UP_3151 | 65          | 58.3                      | F   | Black/African American | BCR-ABL1 p190     | n/a                                                                                                                               |                     | hyperCVAD                               | yes - dasatinib | no      |
| 24                      | UP_3186 | 53          | 75.4                      | F   | Caucasian              | BCR-ABL1 p210     | 46,XX                                                                                                                             |                     | hyperCVAD                               | yes - dasatinib | yes     |
| 25                      | UP_3285 | 88          | 56                        | M   | Caucasian              | BCR-ABL1 p190     | 46,XY,der(9)del(9)(p22)t(9;22)(q34;q11.2),der(22)t(9;22)[10]/46,XY,-8,der(9)t(8;9)(q12;p22)t(9;22)(q34;q11.2)x2,der(22)t(9;22)[8] |                     | prednisone                              | yes - dasatinib | no      |
| 26                      | UP_3304 | 42          | 18.6                      | F   | Caucasian              | BCR-ABL1 p210     | 46,XX                                                                                                                             |                     | hyperCVAD                               | yes - dasatinib | no      |
| 27                      | UP_3360 | 40          | 22.7                      | F   | Caucasian              | BCR-ABL1 p190     | 46,XX                                                                                                                             |                     | S0805                                   | yes - dasatinib | yes     |
| 28                      | UP_3434 | 59          | 30.9                      | M   | Caucasian              | BCR-ABL1 p190     | 46,XY                                                                                                                             |                     | S0805                                   | yes - dasatinib | yes     |
| 29                      | UP_3529 | 79          | 126.1                     | F   | Caucasian              | BCR-ABL1 p210     | 46,XX,t(9;22)(q34;q11.2)[9]                                                                                                       |                     | prednisone, cytarabine, methotrexate    | yes - dasatinib | unknown |
| 30                      | UP_3757 | 45          | 45.3                      | M   | Caucasian              | BCR-ABL1 p210     | 46,XY,der(2)t(1;2)(q12;q37),t(7;9;22)(q11.2;q34;q11.2)[7]                                                                         |                     | S0805                                   | yes - dasatinib | yes     |
| 31                      | UP_4260 | 53          | 38.6                      | M   | Black/African American | BCR-ABL1 p210     | 46,XY,t(9;22)(q34;q11.2)[2]/44,XY,der(4)t(9;22)(q34;q11.2)t(4;9)(p15.2;q21),-7,-9,der(22)t(9;22)[14]/46,XY[4]                     |                     | hyperCVAD                               | yes - dasatinib | no      |
| 32                      | UP_5204 | 74.3        | 73.5                      | M   | Caucasian              | BCR-ABL1 p210     | 46,XY,t(9;22)(q34;q11.2)[5]/50,idem,+Y,t(7;15)(p13;q15),+8,+10,+21[6]                                                             |                     | prednisone                              | yes - dasatinib | no      |

\* HSCT = hematopoietic stem cell transplantation, TKI = tyrosine kinase inhibitor, USI = unique specimen identifier, WBC = white blood cell



**Supplemental Table 2**

| Cell line  | Genetic rearrangement | JAK2 mutation | Malignancy type  | LDA positive | Source                                                                           |
|------------|-----------------------|---------------|------------------|--------------|----------------------------------------------------------------------------------|
| MUTZ5      | <i>IGH-CRLF2</i>      | R683G         | B-ALL            | yes          | DSMZ                                                                             |
| MHH-CALL-4 | <i>IGH-CRLF2</i>      | I682F         | B-ALL            | yes          | DSMZ                                                                             |
| BV173      | <i>BCR-ABL1</i>       |               | B-ALL            |              | DSMZ                                                                             |
| TOM-1      | <i>BCR-ABL1</i>       |               | B-ALL            |              | DSMZ                                                                             |
| SUP-B15    | <i>BCR-ABL1</i>       |               | B-ALL            |              | DSMZ                                                                             |
| HAL-01     | <i>TCF3-HLF</i>       |               | B-ALL            |              | DSMZ                                                                             |
| RCH-ACV    | <i>TCF3-PBX1</i>      |               | B-ALL            |              | DSMZ                                                                             |
| 697        | <i>TCF3-PBX1</i>      |               | B-ALL            |              | DSMZ                                                                             |
| Kasumi-2   | <i>TCF3-PBX1</i>      |               | B-ALL            |              | DSMZ                                                                             |
| HAL-01     | <i>TCF3-HLF</i>       |               | B-ALL            |              | DSMZ                                                                             |
| NALM-6     | <i>ETV6-PDGFRB</i>    |               | B-ALL            |              | DSMZ                                                                             |
| KOPN-8     | <i>KMT2A-MLL1</i>     |               | B-ALL            |              | DSMZ                                                                             |
| HB11;19    | <i>KMT2A-MLL1</i>     |               | B-ALL            |              | Gift from Dr Patrick Brown<br>(Johns Hopkins University; Baltimore,<br>Maryland) |
| SEM        | <i>KMT2A-AFF1</i>     |               | B-ALL            |              | DSMZ                                                                             |
| REH        | <i>ETV6-RUNX1</i>     |               | B-ALL            |              | DSMZ                                                                             |
| SMS-SB     | <i>PDGFRB+</i>        |               | B-ALL            |              | Gift from Dr Markus Muschen<br>(City of Hope; Duarte, California)                |
| Ramos      | <i>MYC-IGH</i>        |               | Burkitt lymphoma |              | DSMZ                                                                             |

| ALL PDX USI               | Genetic rearrangement | JAK2 mutation | Other genetic alterations       | LDA positive | Diagnosis/ Relapse | Source                                                               |
|---------------------------|-----------------------|---------------|---------------------------------|--------------|--------------------|----------------------------------------------------------------------|
| UP_ALL2142                | <i>IGH-CRLF2</i>      |               |                                 | yes          | diagnosis          | Penn SCXC                                                            |
| ALL121                    | <i>IGH-CRLF2</i>      | R683G         |                                 | yes          | relapse            | CHOP CCCR                                                            |
| JH331                     | <i>IGH-CRLF2</i>      | R683G         |                                 | yes          | diagnosis          | COG                                                                  |
| ALL2128                   | <i>IGH-CRLF2</i>      |               |                                 | no           | diagnosis          | CHOP CCCR                                                            |
| UP_ALL588                 | <i>P2YR8-CRLF2</i>    |               |                                 | yes          | relapse            | Penn SCXC                                                            |
| ALL4364                   | <i>P2YR8-CRLF2</i>    | R683G         |                                 | yes          | relapse            | CHOP CCCR                                                            |
| ALL185GD                  | <i>P2RY8-CRLF2</i>    |               | <i>PAX5-AUTS2, CDKN2A/B del</i> | yes          | diagnosis          | COG                                                                  |
| NL482A                    | <i>BCR-JAK2</i>       |               |                                 | yes          | diagnosis          | COG                                                                  |
| NL112                     | <i>STRN3-JAK2</i>     |               |                                 | yes          | diagnosis          | COG                                                                  |
| PAXDBJ                    | <i>GOLAG5-JAK2</i>    |               |                                 | yes          | diagnosis          | CHOP CCCR                                                            |
| UP_ALL240                 | <i>IGH-EPOR</i>       |               |                                 | yes          | diagnosis          | Penn SCXC                                                            |
| NL432                     | <i>EBF1-PDGFRB</i>    |               |                                 | yes          | diagnosis          | COG                                                                  |
| NH011                     | <i>NUP214-ABL1</i>    |               | <i>IKZF1, CDKN2A, PAX5 dels</i> | yes          | diagnosis          | COG                                                                  |
| ALL-NT                    | <i>RCSD1-ABL1</i>     |               |                                 | yes          | relapse            | CHOP CCCR                                                            |
| PHL3                      | <i>ETV6-ABL1</i>      |               |                                 | yes          | diagnosis          | COG                                                                  |
| TVA1                      | <i>ETV6-ABL1</i>      |               |                                 | yes          | diagnosis          | Gift from Drs Vo and<br>Fruman (University of<br>California, Irvine) |
| UP_ALL3529                | <i>BCR-ABL1</i>       |               |                                 | (yes; Ph+)   | diagnosis          | Penn SCXC                                                            |
| UP_ALL5204                | <i>BCR-ABL1</i>       |               |                                 | (yes; Ph+)   | diagnosis          | Penn SCXC                                                            |
| ALL1807<br>(STL-CHPB1719) | <i>TCF3-HLF</i>       |               | <i>IKZF1 del</i>                | no           | relapse            | CHOP CCCR                                                            |

| B-ALL patient specimen (adult) | Genetic rearrangement | JAK2 mutation | LDA positive | Diagnosis/ Relapse | Source    |
|--------------------------------|-----------------------|---------------|--------------|--------------------|-----------|
| 240                            | <i>IGH-EPOR</i>       |               | yes          | diagnosis          | Penn SCXC |
| 480                            | <i>IGH-CRLF2</i>      |               | yes          | diagnosis          | Penn SCXC |
| 1003                           | <i>IGH-CRLF2</i>      |               | yes          | relapse            | Penn SCXC |
| 2142                           | <i>IGH-CRLF2</i>      |               | yes          | diagnosis          | Penn SCXC |
| 3808                           | <i>IGH-CRLF2</i>      | R938Q         | yes          | diagnosis          | Penn SCXC |
| 4988                           | <i>IGH-CRLF2</i>      | F694S         | yes          | relapse            | Penn SCXC |
| 386                            | <i>P2RY8-CRLF2</i>    | R683G         | yes          | diagnosis          | Penn SCXC |
| 331                            | <i>BCR-ABL1</i>       |               |              | relapse            | Penn SCXC |
| 1969                           | <i>BCR-ABL1</i>       |               |              | diagnosis          | Penn SCXC |
| 3186                           | <i>BCR-ABL1</i>       |               |              | diagnosis          | Penn SCXC |
| 3151                           | <i>BCR-ABL1</i>       |               |              | diagnosis          | Penn SCXC |
| 3757                           | <i>BCR-ABL1</i>       |               |              | diagnosis          | Penn SCXC |
| 4835                           | <i>BCR-ABL1</i>       |               |              | diagnosis          | Penn SCXC |
| 3958                           | trisomy 13, del(17p)  |               |              | diagnosis          | Penn SCXC |

\* CHOP CCCR = Children's Hospital of Philadelphia Center for Childhood Cancer Research (Philadelphia, Pennsylvania), COG = Children's Oncology Group (Monrovia, California), DSMZ = Deutsche Sammlung von Mikroorganismen und Zellkulturen (<https://www.dsmz.de/>); Leibniz Institute; Braunschweig, Germany), Penn SCXC = University of Pennsylvania Stem Cell and Xenograft Core (Philadelphia, Pennsylvania)

**Supplemental Table 3**

| <b>Drug Name</b>                    | <b>Target</b>              | <b>Vendor</b>      | <b>Product ID#</b> |
|-------------------------------------|----------------------------|--------------------|--------------------|
| ruxolitinib<br>(formerly INCB18424) | JAK1/2                     | Incyte Corporation |                    |
| ruxolitinib                         | JAK1/2                     | SelleckChem        | S1378              |
| idelalisib<br>(formerly CAL-101)    | PI3K $\delta$              | SelleckChem        | S2226              |
| parsaclisib<br>(INCB050465)         | PI3K $\delta$              | Incyte Corporation |                    |
| dasatinib                           | SRC/ABL/BTK                | LC Laboratories    | D-3307             |
| selumetinib                         | MEK                        | LC Laboratories    | S-4490             |
| dexamethasone                       | glucocorticoid<br>receptor | Mylan              | 67457-422-54       |

Supplemental Table 4

| <b>Antibodies used for Western blotting</b> |              |                     |             |
|---------------------------------------------|--------------|---------------------|-------------|
| <b>Antigen</b>                              | <b>Clone</b> | <b>Manufacturer</b> | <b>ID #</b> |
| pJAK2-Tyr1007/1008                          |              | Cell Signaling      | 3771S       |
| JAK2                                        | D2E12        | Cell Signaling      | 3230S       |
| pSTAT5-Tyr694                               | D47E7        | Cell Signaling      | 4322S       |
| STAT5                                       | D2O6Y        | Cell Signaling      | 94205S      |
| STAT5                                       | C-17         | Santa Cruz          | SC-835-G    |
| pAKT-Ser473                                 | D9E          | Cell Signaling      | 4060L       |
| AKT                                         | C67E7        | Cell Signaling      | 4691L       |
| pERK-Thr202/Tyr204                          | D13.14.4E    | Cell Signaling      | 4370S       |
| ERK                                         | 3A7          | Cell Signaling      | 9107S       |
| pS6-Ser240/244                              | D68F8        | Cell Signaling      | 5364L       |
| S6                                          | 5G10         | Cell Signaling      | 2217L       |
| pSRC-Tyr416                                 |              | Cell Signaling      | 2101S       |
| LYN                                         | C13F9        | Cell Signaling      | 2796S       |
| PTPN6                                       | C14H6        | Cell Signaling      | 3759S       |
| CD79A                                       |              | Cell Signaling      | 3351S       |
| CD79B                                       | D7V2F        | Cell Signaling      | 96024S      |
| CD19                                        | D4V4B        | Cell Signaling      | 90176S      |
| pBTK-Tyr223                                 | D9T6H        | Cell Signaling      | 87141S      |
| BTK                                         | D6T2C        | Cell Signaling      | 56044S      |
| BCL6                                        | D65C10       | Cell Signaling      | 5650S       |
| beta-actin                                  | AC-15        | Sigma-Aldrich       | A5441       |
| pFOXO1-T24/FOXO3-T32                        |              | Cell Signaling      | 9464S       |
| FOXO1                                       | c29h4        | Cell Signaling      | 2880S       |
| <b>Immunohistochemistry</b>                 |              |                     |             |
| <b>Antigen</b>                              | <b>Clone</b> | <b>Manufacturer</b> | <b>ID #</b> |
| CD79A                                       | HM47/A9      | ThermoFisher        | MA-513212   |
| CD79B                                       | EPR6861      | Abcam               | ab134147    |
| <b>Flow cytometry</b>                       |              |                     |             |
| <b>Antigen (mouse)</b>                      | <b>Clone</b> | <b>Manufacturer</b> | <b>ID #</b> |
| CD19-APC-Cy7                                | 1D3          | BD                  | 557655      |
| TSLPR (CRLF2)-PE                            | eBio1A6      | ThermoFisher        | 12-5499-42  |
| <b>Antigen (human)</b>                      | <b>Clone</b> | <b>Manufacturer</b> | <b>ID #</b> |
| CD10-PE-Cy7                                 | eBioCB-CALLA | ThermoFisher        | 25-0106-42  |
| CD19-APC-Cy7                                | SJ25-C1      | ThermoFisher        | A15429      |
| CD19-BV786                                  | SJ25C1       | BD                  | 563325      |
| CD19-PE                                     | H1B19        | ThermoFisher        | 12-0199-42  |
| CD43-PE                                     | CD43-10G7    | Biolegend           | 343204      |
| CD45-APC                                    | HI30         | ThermoFisher        | MHCD4505    |
| CD45-APC                                    | 2D1          | ThermoFisher        | 17-9459-42  |
| CD79A-Alexa488                              | ZL7-4        | BioRad              | MCA1298A488 |
| CD79B-PE-Cy5                                | CB3-1        | BD                  | 551063      |
| TSLPR (CRLF2)-PE                            | eBio1A6      | ThermoFisher        | 12-5499-42  |
| TSLPR (CRLF2)-PerCP                         | 1A6          | ThermoFisher        | 46-5499-41  |
| pAKT <sup>T308</sup> -Alexa 488             | D25E6        | Cell Signaling      | 43506S      |
| pAKT <sup>S473</sup> -Alexa 647             | D9E          | Cell Signaling      | 4075S       |
| pERK <sup>T202/Y204</sup> -Alexa 647        | D13.14.4E    | Cell Signaling      | 4284S       |

## Supplemental Table 5

| MUTZ5               |                           |             |                          |                      |      |             |
|---------------------|---------------------------|-------------|--------------------------|----------------------|------|-------------|
| Sequence variant(s) |                           |             |                          |                      |      |             |
| Gene                | Genomic Position (hg19)   | Reference   | Nucleotide               | Amino Acid           | VAF  | Comment     |
| <i>IKZF1</i>        | chr7:50444470-50444471    | NM_006060.5 | c.400_401insGGG<br>CTCCG | p.Val134Glyfs*<br>62 | 0.58 |             |
| <i>JAK2</i>         | chr9:5078360-5078360      | NM_004972.3 | c.2047A>G                | p.Arg683Gly          | 0.41 | COSM29300   |
| <i>CDC25C</i>       | chr5:137621491-137621491  | NM_001790.4 | c.1312C>G                | p.Gln438Glu          | 0.41 |             |
| <i>NSD1</i>         | chr5:176637415-176637415  | NM_022455.4 | c.2015C>T                | p.Thr672Ile          | 0.49 |             |
| <i>SF1</i>          | chr11:64534522-64534522   | NM_004630.3 | c.1432A>T                | p.Met478Leu          | 0.53 |             |
| <i>SH2B3</i>        | chr12:111885984-111885984 | NM_005475.2 | c.1606G>A                | p.Ala536Thr          | 0.42 | rs140649197 |

| Copy Number Variant(s) |             |             |                       |                                         |  |
|------------------------|-------------|-------------|-----------------------|-----------------------------------------|--|
| Chromosome             | Band        | Abnormality | Gene                  | Comments                                |  |
| X                      | partial Xp  | loss        | <i>KDM6A</i>          | Homozygous deletion                     |  |
| 2                      | partial 2p  | loss        | <i>MSH6</i>           |                                         |  |
| 4                      | partial 4p  | loss        | <i>LEF1</i>           |                                         |  |
| 5                      | partial 5p  | loss        | <i>EBF1</i>           |                                         |  |
| 7                      | partial 7p  | loss        | <i>IKZF1</i>          |                                         |  |
| 9                      | partial 9p  | loss        | <i>CDKN2A/B, PAX5</i> | Homozygous deletion of <i>CDKN2A/2B</i> |  |
| 10                     | partial 10p | loss        | <i>PTEN</i>           |                                         |  |
| 10                     | partial 12p | loss        | <i>ETV6</i>           | Homozygous deletion                     |  |

| MHH-CALL-4          |                              |             |                   |                    |      |                             |
|---------------------|------------------------------|-------------|-------------------|--------------------|------|-----------------------------|
| Sequence variant(s) |                              |             |                   |                    |      |                             |
| Gene                | Genomic Position (hg19)      | Reference   | Nucleotide        | Amino Acid         | VAF  | Comment                     |
| <i>JAK2</i>         | chr9:5078357-5078357         | NM_004972.3 | c.2044A>T         | p.Ile682Phe        | 0.48 | COSM303887                  |
| <i>ETV6</i>         | chr12:12038883-<br>12038896  | NM_001987.4 | c.1177_1189del    | p.Lys393Profs*8    | 0.83 |                             |
| <i>KRAS</i>         | chr12:25398251-<br>25398251  | NM_033360.3 | c.68T>G           | p.Leu23Arg         | 0.44 | rs730880472;C<br>OSM303853  |
| <i>KMT2D</i>        | chr12:49426916-<br>49426917  | NM_003482.3 | c.11571_11572insT | p.Gln3858Serfs*154 | 0.1  |                             |
| <i>USH2A</i>        | chr1:216052344-<br>216052344 | NM_206933.2 | c.8320G>A         | p.Ala2774Thr       | 0.46 | rs111033533;C<br>OSM4783112 |
| <i>ABL1</i>         | chr9:133760372-<br>133760372 | NM_005157.5 | c.2695C>T         | p.Pro899Ser        | 0.45 | rs767171554                 |

| Copy Number Variant(s) |             |             |                        |                                     |  |
|------------------------|-------------|-------------|------------------------|-------------------------------------|--|
| Chromosome             | Band        | Abnormality | Gene                   | Comments                            |  |
| 7                      | partial 7p  | loss        | <i>IKZF1</i>           |                                     |  |
| 9                      | partial 9p  | loss        | <i>CDKN2A/2B, PAX5</i> | Homozygous loss of <i>CDKN2A/2B</i> |  |
| 12                     | partial 12p | loss        | <i>ETV6</i>            |                                     |  |

## Supplemental Table 6

| Viral construct                           | Insert                                                                                                  | Notes                                             | Vector                                                            | Ligation method                                            |
|-------------------------------------------|---------------------------------------------------------------------------------------------------------|---------------------------------------------------|-------------------------------------------------------------------|------------------------------------------------------------|
| <i>CRLF2</i><br>retro myc IRES<br>mcherry | PCR product, Genescript OHu23392D<br>myc tag (NotI, AgeI cloning sites, for C-terminal myc epitope tag) |                                                   | lentiCRISPRv2 blast Addgene 398239 <sup>1</sup>                   | Gibson (NEB HiFi)<br>oligo ligation/T4 ligase (invitrogen) |
| <i>PAX-JAK2</i>                           | PCR of N-term PAX5, Genescript OHu14569D                                                                | Junction in<br><a href="#">PMID: 2289784</a><br>I | IRES mCherry Addgene 80139 <sup>2</sup><br>retro myc IRES mCherry | Gibson (NEB HiFi)                                          |
| <i>EBF-PDGFRB</i>                         | PCR of C-term JAK2 (Addgene 23915)<br>PCR of N-term EBF1, Genescript OHu20245D                          | Junction in<br><a href="#">PMID: 2289784</a><br>I | retro myc IRES mCherry                                            | Gibson (NEB HiFi)                                          |
| <i>JAK2 R683G</i>                         | PCR of C-term PDGFRB, Genescript OHu25829D<br>PCR product, Addgene JAK2 (23915) <sup>3</sup>            | I                                                 | retro myc IRES mCherry                                            | Gibson (NEB HiFi)                                          |

| Viral construct    | Notes                   | Source                                         |
|--------------------|-------------------------|------------------------------------------------|
| MSCV-RFP           | Control vector for GFPi | Kind gift from Jocelyne Demengeot <sup>4</sup> |
| MSCV-GFPi          | RAG activity reporter   | Kind gift from Jocelyne Demengeot <sup>4</sup> |
| Luciferase-T2A-GFP |                         |                                                |

### References for constructs:

1. Stringer, B.W., et al. A reference collection of patient-derived cell line and xenograft models of proneural, classical and mesenchymal glioblastoma. *Scientific reports* 9, 4902 (2019).
2. Dick, H.M., Wright, P., Chapman, C.M., Zacharias, F.J. & Nicholls, J.T. Adverse reactions to practolol: some observations on the possible relevance to immune mechanisms. *Allergy* 33, 71-75 (1978).
3. Wang, S., et al. JAK2-binding long noncoding RNA promotes breast cancer brain metastasis. *The Journal of clinical investigation* 127, 4498-4515 (2017).
4. Trancoso I, Bonnet M, Gardner R, Carneiro J, Barreto VM, Demengeot J, and Sarmiento LM. A Novel Quantitative Fluorescent Reporter Assay for RAG Targets and RAG Activity. *Frontiers in immunology*. 2013;4(110).

**Supplemental Table 7**

| <b>Quantitative RT-PCR primers</b> | <b>Sequence</b>                                        |
|------------------------------------|--------------------------------------------------------|
| <i>BCL6</i>                        | F_TGAGAAGCCCTATCCCTGTG<br>R_TGTGACGGAAATGCAGGTTA       |
| <i>BLNK</i>                        | F_CCAGCTGGCCTTCAGAGAAA<br>R_ATGAAAAGCTGGGTAGGGGC       |
| <i>RAG1</i>                        | F_ATAGAAGAAAGCAACACAAAAGC<br>R_ATACTGAGTTCAATCCCTGAAGA |
| <i>RAG2</i>                        | F_ATAGCAAGAGCTCTACACACTCC<br>R_AAAAATCAGATCAGAAATCCTCA |
| <i>SYK</i>                         | F_CACAAAGCAAAGGCAGTCCC<br>R_AGGGGGAAAGTAAGCCAAGC       |
| <i>COX6B</i>                       | F_AACTACAAGACCGCCCCTTT<br>R_GCAGCCAGTTCAGATCTTCC       |
| <b>sgRNAs purchased from IDT</b>   | <b>Sequence</b>                                        |
| <i>CD79B</i>                       | CD79B.1.AA_AACACCTCGGAGGTCTACCA                        |
| <i>CRLF2</i>                       | CRLF2.1.AC ACCTGCAACGTCACCATAGA                        |

# Supplemental Table 8

| Gene expression signature |              |          |               |          |              |            |            |               |               |
|---------------------------|--------------|----------|---------------|----------|--------------|------------|------------|---------------|---------------|
| Up-differentiation        |              |          |               |          |              |            |            |               |               |
| BCL6                      | PAFAH1B3     | PHKA2    | CMTM7         | PGLS     | WDR90        | CLK1       | TRAPPC1    | ECH1          | ABI1          |
| FCRLA                     | BLNK         | HDAC5    | PSRC1         | PNRC2    | SFSWAP       | GABARAP    | DESI1      | CENPN         | WDR81         |
| CD72                      | DDIT4        | B3GNT8   | DYNLT1        | APOBEC1  | PCYT1A       | RNF167     | UTRN       | CD24          | ZFP36L1       |
| TMPRSS3                   | CCNG2        | DNTT     | RHOQ          | ZBTB20   | ZCCHC6       | RMND5B     | FOXP1      | RAB37         | PPP2R5A       |
| LAPTM5                    | TIFA         | TMEM71   | KLHL24        | CSRP2    | CARHSP1      | INPL1      | SYAP1      | REEP5         | PRR14         |
| UBLCP1                    | AP003419.11  | CXCR4    | IRF8          | GPR155   | CCNB2        | KIF23      | RDH11      | ERO1B         | FAM107B       |
| NATD1                     | ARNTL        | SORD     | PLEKHO1       | B3GNT2   | MANBA        | GIT2       | CD53       | LYRM2         | PRKCG         |
| SPP1                      | WBP1         | LGR5     | CDC42EP3      | SRGN     | RFX5         | TGFBR2     | SKAP2      | HIVEP1        | PLEKHO2       |
| YPEL5                     | IL2RA        | PIK3AP1  | ITM2B         | MTURN    | PIGH         | ZFP36L2    | DDIT3      | LAMP2         | CARNS1        |
| ADSSL1                    | ZFPM1        | IGHV1-69 | TESK2         | WDFY1    | CHKB         | TNFRSF13C  | RSPH9      | AMDHD1        | KDM3B         |
| RGS2                      | RPL3L        | EQTN     | EBF1          | RDH12    | RAMP1        | PTPRC      | AC027682.1 | TPP1          | ZC3H7A        |
| IL12A                     | SMARCA4      | MTSS1    | ATP6AP1       | STX5     | CENPF        | TCTA       | EHD2       | KIF22         | NR3C1         |
| PECAM1                    | CTD-2545M3.6 | NUSAP1   | ARHGAP17      | RELB     | CENPE        | ASPM       | FBXO11     | UCP2          | TTC28         |
| NTMT1                     | HERPUD1      | MYLIP    | SLC15A2       | POLM     | PCMTD2       | ATP6V1D    | IQSEC1     | STK17B        | TRIM6-TRIM34  |
| PIPOX                     | HIST3H2A     | MXD3     | TSPYL4        | SYK      | CIC          | SLA        | PXK        | BIRC3         | TRIP4         |
| RAB43                     | CDKN1A       | IL7R     | SERP1         | OGT      | MPP1         | NT5C2      | HEXB       | GTPBP2        | STK11IP       |
| MYL4                      | BLK          | SPATA6   | TSPAN17       | MYB      | PIK3CG       | CDCA3      | ATXN7L1    | RELL1         | ZDHHC14       |
| SBK1                      | TXNIP        | RSPH1    | COX2A2L       | TCIRG1   | DNASE1       | FCHO1      | TMA16      | MKI67         | GPSM3         |
| PFN2                      | CPEB4        | KLF13    | ELK3          | PLGRKT   | CCPG1        | IFFO1      | MDM1       | CRLF2         | ZBTB18        |
| BACH2                     | UNC93B1      | IRF4     | LGALS9        | SKIL     | NDUFAF3      | ZEB2       | TRIM59     | IIFT22        | CCNI          |
| MXD4                      | PHKA1        | ATP2A3   | PNRC1         | TRIOBP   | VAMP8        | UNC119B    | LMO2       | NCAPD2        | ATG12         |
| EGFL6                     | PLEKHG2      | CDC25B   | ZFAND3        | PRKCB    | MYO18A       | TOB1       | NRM        | ITGAM         | IRF2          |
| MBD4                      | PIAS3        | TBX6     | PINK1         | LITAF    | TUBA1A       | GF11B      | TRAFD1     | CTNNA1        | IFNA7         |
| SELL                      | SIT1         | NFKBIE   | DDX54         | RDM1     | HINT3        | TRAM1      | CCDC88A    | PCBD1         | IFNA7         |
| YPEL3                     | GFRA1        | EMP1     | PITPNM1       | ARHGAP45 | DUSP2        | FOXO1      | GRINA      | CDC37L1       | PHF1          |
| CXXC5                     | CPT1A        | ABC4     | ITPR2         | PQLC3    | INPP5K       | AC013264.1 | IFT122     | PIAS1         | PNPLA8        |
| SLC23A1                   | H2AFV        | PLEKHA2  | TCF19         | CRLF1    | FRYL         | SPEF1      | SIRT7      | AGFG2         | ZRSR1         |
| PREP                      | BTG2         | IFT80    | TSPO          | PARP4    | SAT1         | HSPA2      | CEP89      | ADCY7         | REEP2         |
| FCGR2C                    | HBP1         | ARHGAP18 | MGST1         | KMT2A    | DUSP6        | SDC4       | HIPK3      | TNFRSF13B     | PPP1R18       |
| EPS8                      | MYADM        | ETS2     | LIMD2         | FMNL3    | COTL1        | CD37       | PLAT       | SLC7A7        | STK10         |
| CHST15                    | FAM63A       | METTL7A  | TCN2          | ARPC5L   | DUSP10       | ZNF821     | RHOH       | RSRP1         | SLC27A4       |
| AP1S2                     | GFRA2        | AKAP12   | NEDD9         | BAZ2B    | TRIM16       | RAB33B     | FAM13B     | BIRC2         | TMEM229B      |
| TP53INP1                  | ELOF1        | BLVRB    | IGKV1-6       | TCF4     | NNT          | CEACAM1    | XRCC6      | CD79A         | ARNT          |
| ZAP70                     | SMIM14       | CNP      | NFAT5         | P2RX3    | CBFA2T3      | CDK5RAP2   | WSB2       | CORO1B        | EPC1          |
| BTG1                      | GDI1         | DNAH8    | AKR1B10       | PSAP     | FAM64A       | ATL2       | MKRN1      | RACGAP1       | SRPK2         |
| SEC63                     | ATP8A1       | OTUB2    | TAX1BP3       | ABCD1    | RCHY1        | RB1        | SERPINI1   | SLAMF1        | SLC30A4       |
| RABGAP1L                  | TRIM11       | GAS7     | WDPCP         | KANSL1L  | MARCKS       | NDC80      | LASP1      | RP11-286N22.8 | CST5          |
| PTGR1                     | IGKV4-1      | SLC12A6  | HIST1H1C      | GADD45A  | BTRC         | TK2        | OSBPL9     | IQGAP1        | STAT2         |
| GLCC1                     | PSEN2        | CAST     | CEACAM3       | NEIL3    | IP6K1        | ATP1B3     | CHFR       | DGKZ          | RBM4B         |
| EMP3                      | TLE6         | CTSE     | MAP1LC3B2     | LUC7L2   | RCSD1        | CD38       | GPM6A      | SH3YL1        | GENPA         |
| MSH5                      | THBD         | CD22     | MYO7A         | GSN      | POC1B-GALNT4 | STX7       | SMIM3      | SOX4          | TM6SF1        |
| DOK3                      | ID2          | MTOR     | KMT2E         | PLD4     | SNAP29       | TGFB1      | GP2        | RRM2          | CHCHD5        |
| NFKBIA                    | RAG2         | GPAM     | CDKN2C        | PDE4B    | LGALS1       | CCM2       | GLRX       | FGD6          | CCDC28A       |
| PHLDA1                    | TP53INP2     | ABCA1    | MAP7          | ICAM2    | NIPBL        | MAST2      | STK3       | UBE2H         | RP11-192H23.4 |
| CERK                      | CDKN1B       | CTDSP2   | TRIB2         | TMEM9B   | ST8SIA4      | SNAPC3     | RNF103     | RRM2B         | SYVN1         |
| CD93                      | CD79B        | ACP5     | CKLF          | SLAMF6   | AAK1         | IL16       | CNOT6L     | CD19          | ANKRD13A      |
| RAG1                      | SLAMF7       | CIT      | HES6          | LHPP     | CNN3         | VRK3       | ZNF207     | CMC2          | C12orf57      |
| CDKN2D                    | PBXIP1       | EHBP1L1  | RP11-307N16.6 | MAP3K1   | SESN3        | TSPAN13    | MEF2D      | SPC25         | CAT           |
| HSPA1A                    | GRN          | EIF2AK3  | EDIL3         | CASP6    | SELP         | HIVEP2     | NSMF       | ELK4          | LTK           |
| SLC12A3                   | TNFRSF19     | PLXDC1   | VPREB3        | SH3KBP1  | RB1CC1       | SP4        | BCL7A      | CYBA          | INPP5D        |
